# Supplementary material for: Clinical Course Long After Atrial Switch: A Novel Risk Score for Major Clinical Events
Source: PubMed Central journal article supplement — J Am Heart Assoc. 2021 Feb 22;10(5):e018565. doi: 10.1161/JAHA.120.018565 (PMC8174274; doi:10.1161/jaha.120.018565), 2021-02-22
Supplement: JAH3-10-e018565-s001.pdf [file JAH3-10-e018565-s001.pdf]

# **SUPPLEMENTAL MATERIAL**

**Table S1. Frequency with which each candidate variable was selected through backwards model selection in 100 bootstrap samples drawn from each of the 100 imputed datasets, with averaged betas over the 100 selected models.**

| <b>Predictors</b>                 | <b>Frequency selected</b> | <b>Averaged Beta</b> | <b>Averaged SE</b> | <b>P value</b> |
|-----------------------------------|---------------------------|----------------------|--------------------|----------------|
| Age > 30                          | <b>100</b>                | 0.90                 | 0.444              | 0.043          |
| Mustard                           | 15                        | 0.09                 | 0.224              | 0.680          |
| Age > 1 year at AtrSO             | <b>100</b>                | 1.48                 | 0.528              | 0.005          |
| Symptoms (NYHA $\geq$ 2)          | 28                        | 0.21                 | 0.868              | 0.812          |
| Prior ventricular arrhythmia      | <b>100</b>                | 1.11                 | 0.433              | 0.011          |
| Pacemaker                         | 0                         |                      |                    |                |
| Prior supraventricular arrhythmia | 0                         |                      |                    |                |
| QRS duration > 120 ms             | 47                        | 0.23                 | 0.258              | 0.378          |
| Heart rate (beats/min)            | 1                         | 0.00                 | 0.018              | 0.921          |
| $\geq$ Moderate RV dysfunction    | <b>93</b>                 | 0.91                 | 0.348              | 0.009          |
| Severe tricuspid regurgitation    | <b>99</b>                 | 1.21                 | 0.225              | 0.000          |
| $\geq$ Mild LV dysfunction        | <b>98</b>                 | 1.41                 | 0.427              | 0.001          |

Baseline variables selected as independent predictors of event-free survival in at least 60% of bootstrap samples in at least 60% of the imputed datasets were included in the final prediction model (Table 3 in the manuscript). The provided risk score was based on the betas of the final model.

**Table S2. Baseline characteristics split by risk category.**

| <i>Complete, n</i>                     | <b>Low<br/>n=91</b> | <b>Intermediate<br/>n=62</b> | <b>High<br/>n=14</b> | <b>p</b> |
|----------------------------------------|---------------------|------------------------------|----------------------|----------|
| <i>Clinical characteristics</i>        |                     |                              |                      |          |
| Age > 30 years                         | 10 (11)             | 52 (84)                      | 12 (86)              | <0.001   |
| Male                                   | 60 (66)             | 36 (58)                      | 8 (57)               | 0.57     |
| Complex TGA                            | 24 (26)             | 22 (36)                      | 5 (36)               | 0.44     |
| Mustard                                | 39 (43)             | 50 (81)                      | 12 (86)              | <0.001   |
| Age > 1 year at AtrSO                  | 18 (20)             | 58 (94)                      | 13 (93)              | <0.001   |
| 162 Symptoms (NYHA 2+)                 | 9 (10)              | 22 (36)                      | 8 (62)               | <0.001   |
| 159 Body mass index, kg/m <sup>2</sup> | 23±4                | 24±4                         | 27±9                 | 0.013    |
| 160 Systolic blood pressure, mmHg      | 120±13              | 122±15                       | 114±14               | 0.13     |
| Prior heart failure hospitalization    | 1 (1)               | 3 (5)                        | 4 (29)               | <0.001   |
| Prior ventricular arrhythmia           | 4 (4)               | 2 (3)                        | 7 (50)               | <0.001   |
| Prior baffle intervention              | 13 (14)             | 11 (18)                      | 2 (14)               | 0.84     |
| ICD                                    | 1 (1)               | 1 (2)                        | 3 (21)               | <0.001   |
| Pacemaker                              | 13 (14)             | 19 (31)                      | 9 (64)               | <0.001   |
| Prior supraventricular tachyarrhythmia | 23 (25)             | 27 (44)                      | 8 (57)               | 0.012    |
| Beta blocker                           | 11 (12)             | 13 (21)                      | 4 (29)               | 0.17     |
| ACE inhibitor                          | 18 (20)             | 19 (31)                      | 8 (57)               | 0.010    |
| Diuretics                              | 1 (1)               | 8 (13)                       | 5 (36)               | <0.001   |
| <i>Electrocardiogram</i>               |                     |                              |                      |          |
| 138 Heart rate, /min                   | 63±14               | 70±16                        | 80±15                | <0.001   |
| 118 QRS duration > 120 ms              | 7 (13)              | 16 (31)                      | 8 (67)               | <0.001   |
| 163 Loss of sinus rhythm               | 18 (20)             | 17 (28)                      | 7 (50)               | 0.057    |
| Ventricular pacing                     | 5 (6)               | 9 (15)                       | 3 (21)               | 0.067    |
| <i>Echocardiography</i>                |                     |                              |                      |          |
| 157 ≥ Moderate RV dysfunction          | 10 (12)             | 19 (33)                      | 9 (64)               | <0.001   |
| 159 Severe tricuspid regurgitation     | 2 (2)               | 3 (5)                        | 7 (50)               | <0.001   |
| 162 ≥ Mild LV dysfunction              | 0 (0)               | 2 (3)                        | 6 (46)               | <0.001   |
| 154 Signs of baffle obstruction        | 14 (17)             | 9 (15)                       | 4 (33)               | 0.32     |
| <i>CMR/CT</i>                          |                     |                              |                      |          |
| 67 LVEDV, ml                           | 136±44              | 149±48                       | 122±34               | 0.40     |
| 65 LVESV, ml                           | 60±27               | 67±24                        | 70±22                | 0.54     |
| 67 LVEF, %                             | 58±9                | 55±10                        | 56±4                 | 0.28     |
| 76 RVEDV, ml                           | 195±67              | 223±59                       | 223±81               | 0.17     |
| 73 RVESV, ml                           | 110±45              | 130±51                       | 140±58               | 0.18     |
| 76 RVEF, %                             | 43±9                | 41±9                         | 40±4                 | 0.50     |
| <i>Exercise testing</i>                |                     |                              |                      |          |
| 68 Peak heart rate, /min               | 174 [160-187]       | 169 [151-179]                | 123 [123-130]        | 0.077    |
| 62 Peak systolic blood pressure, mmHg  | 174±32              | 167±31                       | 163±29               | 0.59     |

Data described as frequency(%), mean±SD, or median[IQR]. Abbreviations: ACE, angiotensin-converting enzyme; AtrSO, atrial switch operation; CMR, cardiovascular magnetic resonance; EDV, end diastolic volume; ESV, end systolic volume; EF, ejection fraction; ICD: implantable cardioverter-defibrillator; LV, left ventricle; NYHA, New York Heart Association class; RV, right ventricle; TGA, transposition of the great arteries.

**Figure S1. Kaplan Meier survival curves.**

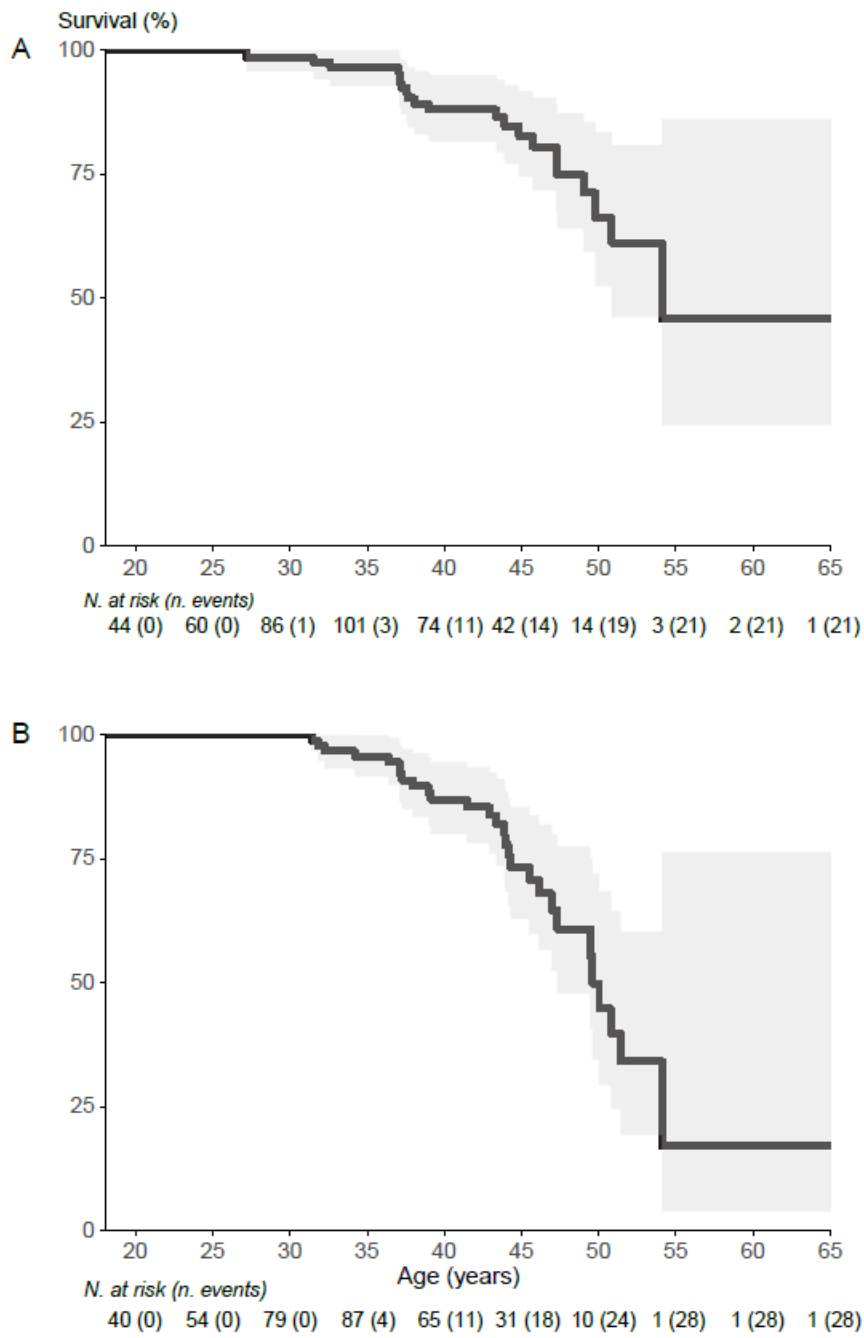

Panel A: Survival to death/transplant/ventricular assist device in all patients. Panel B: event-free survival in event-naïve patients.

**Figure S2. Risk score model calibration.**

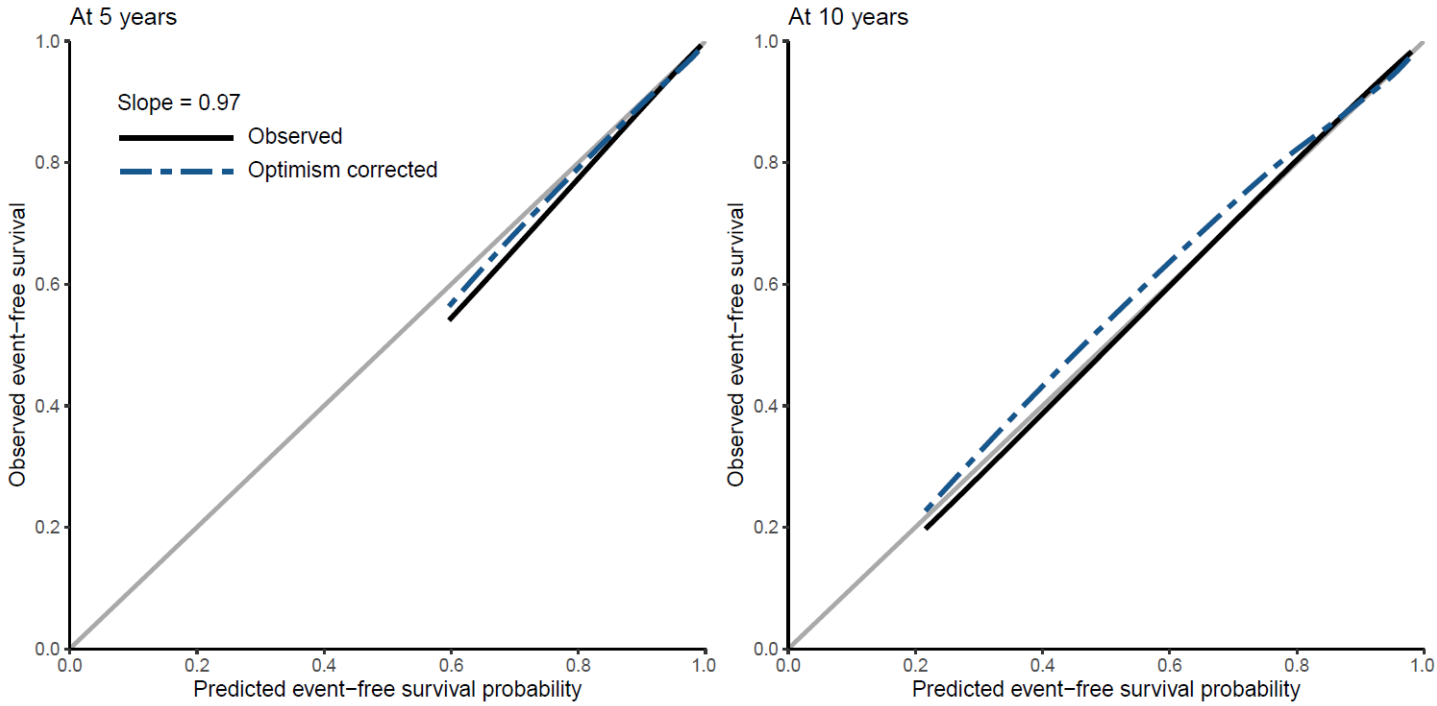

Predicted event-free survival according to the risk score versus observed event-free survival at 5 years of follow-up (left panel) and 10 years of follow-up (right panel).

**Figure S3. Kaplan Meier for all-cause mortality by risk group.**

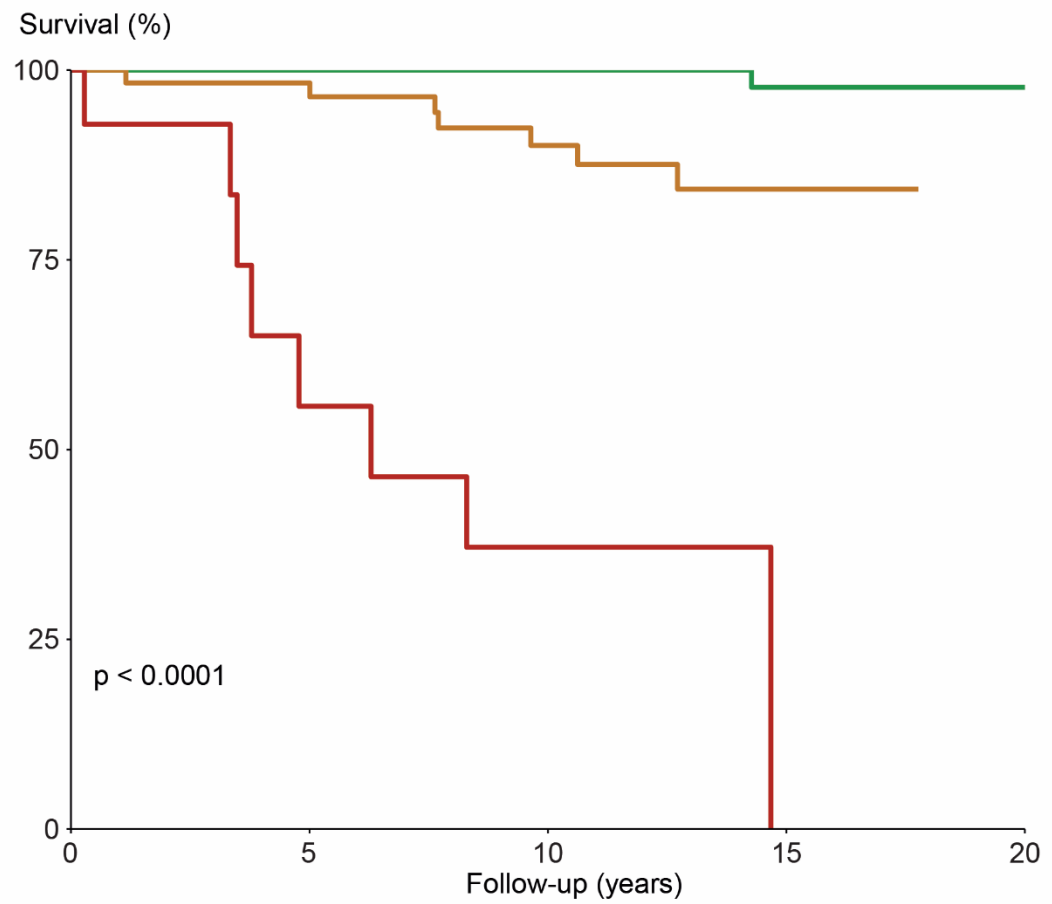

|                   |        |        |        |        |       |
|-------------------|--------|--------|--------|--------|-------|
| Low risk          | 91 (0) | 84 (0) | 72 (0) | 35 (1) | 1 (1) |
| Intermediate risk | 62 (0) | 54 (1) | 37 (5) | 12 (7) | 0 (7) |
| High risk         | 14 (0) | 6 (5)  | 3 (7)  | 0 (8)  | 0 (8) |

Observed survival of patients with predicted low (<5% in 5 years), intermediate (5-20% in 5 years) and high risk of events (>20% in 5 years).
